# Supplementary material
Source: Research Square preprint supplement (doi:10.21203/rs.3.rs-9969797/v1)
Supplement: Supplementary file 1 [file bdb97a2c47b53b745f0032c8.docx]

**Additional file Content**

**Table S1.** Extreme TyG-WHtR outliers excluded due to implausible height values

**Table S2.** Summary of missing value proportions for the candidate baseline variables

**Table S3.** Variance inflation factors (VIF) for covariates included in the multivariable mode

**Table S4.** Comprehensive baseline characteristics of the study population stratified by quartiles of TyG-WHtR (after multiple imputation)

**Table S5.** Comprehensive baseline characteristics of the study population stratified by incident arthritis status (after multiple imputation)

**Table S6.** Baseline characteristics of the study population stratified by quartiles of TyG-WHtR using the original, un-imputed dataset

**Table S7.** Baseline characteristics of the study population stratified by incident arthritis status using the original, un-imputed dataset

Table S 1 TyG-WHtR outliers excluded due to implausible height values

| ID | Wave | Sex | Age, years | TyG index | BMI,kg/m² | Height, m | Weight, kg | Waist Circumference, cm |
| --- | --- | --- | --- | --- | --- | --- | --- | --- |
| 153859216001 | 1 | female | 56 | 8.33 | 427.911 | 0.33 | 46.6 | 77.8 |
| 194037301002 | 1 | female | 61 | 8.702 | 478.2961 | 0.353 | 59.6 | 82.7 |
| 281116308002 | 1 | female | 47 | 8.568114 | 2449.954 | 0.165 | 66.7 | 99.8 |
| 296006320001 | 1 | female | 60 | 8.716891 | 542.6599 | 0.335 | 60.9 | 91.2 |

Note: These four records were excluded because their height values were considered biologically implausible and likely attributable to data entry errors.

Abbreviations: BMI, body mass index; TyG, triglyceride-glucose index.

Table S 2 Summary of missing value proportions for the candidate baseline variables

| Number | Variable | Missing Rate (%) | Strategy |
| --- | --- | --- | --- |
| 1 | Regular physical exercise | 57.05510052 | Excluded |
| 2 | Total household income | 37.73268801 | Excluded |
| 3 | Pension receipt | 20.71854058 | Excluded |
| 4 | Life satisfaction | 9.28890544 | Included as candidate variables  Included as candidate variables |
| 5 | Dyslipidemia | 1.65673864 |
| 6 | Sleep duration | 1.43335815 |
| 7 | Psychological health (CESD-10) | 1.00521221 |
| 8 | White blood cells | 0.98659717 |
| 9 | Basic Activities of Daily Living | 0.87490692 |
| 10 | Diabetes | 0.81906180 |
| 11 | History of falls | 0.78183172 |
| 12 | Hip fracture | 0.72598660 |
| 13 | Kidney disease | 0.57706627 |
| 14 | Liver disease | 0.53983619 |
| 15 | Heart disease | 0.48399106 |
| 16 | Insurance | 0.40953090 |
| 17 | Mental illness | 0.40953090 |
| 18 | Hypertension | 0.37230082 |
| 19 | Stroke | 0.29784066 |
| 20 | Chronic lung disease | 0.27922561 |
| 21 | Digestive disease | 0.26061057 |
| 22 | Body mass index | 0.24199553 |
| 23 | Smoking status | 0.22338049 |
| 24 | Memory disease | 0.22338049 |
| 25 | Asthma | 0.16753537 |
| 26 | low density lipoprotein | 0.16753537 |
| 27 | Drinking status | 0.07446016 |
| 28 | Education level | 0.05584512 |
| 29 | Age | 0.00000000 |
| 30 | Sex | 0.00000000 |
| 31 | Marital status | 0.00000000 |
| 32 | Residence | 0.00000000 |
| 33 | Blood glucose | 0.00000000 |
| 34 | Total cholesterol | 0.00000000 |
| 35 | Triglycerides | 0.00000000 |
| 36 | high density lipoprotein | 0.00000000 |
| 37 | C-reactive protein | 0.00000000 |
| 38 | Instrumental Activities of Daily Living | 0.00000000 |

Table S3 Variance inflation factors (VIF) for covariates included in the multivariable mode

| Covariate | VIF (Median [Range]) | Mean_VIF | Median_VIF | Min_VIF | Max_VIF | All_Imputations_VIF_LT_5 |
| --- | --- | --- | --- | --- | --- | --- |
| Age | 1.158 [1.158-1.158] | 1.15817749 | 1.15817037 | 1.15810121 | 1.15825617 | TRUE |
| Sex | 1.537 [1.536-1.538] | 1.53728 | 1.53727135 | 1.53640751 | 1.53814652 | TRUE |
| Marital status | 1.060 [1.060-1.060] | 1.06027133 | 1.06028577 | 1.06022469 | 1.06030668 | TRUE |
| Education level | 1.063 [1.063-1.063] | 1.06307508 | 1.06310771 | 1.06297107 | 1.06312099 | TRUE |
| Residence | 1.041 [1.041-1.041] | 1.04138303 | 1.04139668 | 1.0412788 | 1.04147688 | TRUE |
| Smoking status | 1.203 [1.202-1.203] | 1.20285815 | 1.20281095 | 1.20240001 | 1.2034465 | TRUE |
| Drinking status | 1.110 [1.109-1.110] | 1.1095369 | 1.10955667 | 1.10924472 | 1.10968713 | TRUE |
| Hypertension | 1.031 [1.030-1.031] | 1.03069232 | 1.03065132 | 1.03045412 | 1.03092657 | TRUE |
| Diabetes | 1.017 [1.016-1.017] | 1.01682476 | 1.01686461 | 1.01634652 | 1.01707634 | TRUE |
| Chronic lung disease | 1.015 [1.015-1.016] | 1.01546746 | 1.01548842 | 1.01529689 | 1.01561167 | TRUE |
| Digestive disease | 1.008 [1.008-1.008] | 1.00779458 | 1.00781467 | 1.00770082 | 1.00783552 | TRUE |
| Total cholesterol (TC) | 1.019 [1.019-1.019] | 1.01902824 | 1.01903588 | 1.01893053 | 1.01908263 | TRUE |
| C-reactive protein (CRP) | 1.006 [1.006-1.006] | 1.00615383 | 1.00615754 | 1.00613264 | 1.00618121 | TRUE |
| IADL | 1.258 [1.256-1.261] | 1.25832017 | 1.2581176 | 1.25551684 | 1.261114 | TRUE |
| BADL | 1.250 [1.247-1.252] | 1.24977898 | 1.24960391 | 1.24704457 | 1.25226813 | TRUE |
| History of falls | 1.015 [1.014-1.015] | 1.01476055 | 1.01491019 | 1.01426467 | 1.01525469 | TRUE |

*Note: VIF values represent the mean/median VIF across multiple imputations*

Table S 4 Comprehensive baseline characteristics of the study population stratified by quartiles of TyG-WHtR (after multiple imputation).

| Characteristics | Total  （n=5372） | Q1  (n=1343) | Q2  (n=1343) | Q3  (n=1343) | Q4  (n=1343) | *P value* |
| --- | --- | --- | --- | --- | --- | --- |
| Age (years) | 59.04±9.40 | 58.76±9.53 | 58.92±9.48 | 58.81±9.41 | 59.68±9.15 | 0.039 |
| Sex, n (%) |  |  |  |  |  | <0.001 |
| Female | 2704 (50.34) | 463 (34.48) | 611 (45.50) | 716 (53.31) | 914 (68.06) |  |
| Male | 2668 (49.66) | 880 (65.52) | 732 (54.50) | 627 (46.69) | 429 (31.94) |  |
| Marital status, n (%) |  |  |  |  |  | 0.349 |
| Others | 624 (11.62) | 146 (10.87) | 157 (11.69) | 148 (11.02) | 173 (12.88) |  |
| Married | 4748 (88.38) | 1197 (89.13) | 1186 (88.31) | 1195 (88.98) | 1170 (87.12) |  |
| Residence, n (%) |  |  |  |  |  | <0.001 |
| Urban | 1982 (36.90) | 408 (30.38) | 421 (31.35) | 552 (41.10) | 601 (44.75) |  |
| Rural | 3390 (63.10) | 935 (69.62) | 922 (68.65) | 791 (58.90) | 742 (55.25) |  |
| Education level, n (%) |  |  |  |  |  | 0.628 |
| Primary school or lower | 3596 (66.93) | 897 (66.78) | 890 (66.27) | 882 (65.66) | 927 (69.02) |  |
| Middle school | 1151 (21.43) | 290 (21.59) | 288 (21.44) | 300 (22.34) | 273 (20.33) |  |
| High school or higher | 625 (11.64) | 156 (11.63) | 165 (12.29) | 161 (12.00) | 143 (10.65) |  |
| Smoking status, n (%) |  |  |  |  |  | <0.001 |
| Never | 3174 (59.08) | 612 (45.58) | 761 (56.69) | 834 (62.10) | 966 (71.93) |  |
| Former smoker | 494 (9.20) | 114 (8.50) | 114 (8.52) | 150 (11.14) | 116 (8.64) |  |
| Current smoker | 1704 (31.72) | 617 (45.91) | 467 (34.79) | 359 (26.76) | 261 (19.43) |  |
| Drinking status,n (%) |  |  |  |  |  | <0.001 |
| Never | 3224 (60.01) | 694 (51.68) | 788 (58.67) | 816 (60.76) | 926 (68.95) |  |
| Former drunk | 425 (7.90) | 118 (8.79) | 104 (7.74) | 107 (7.94) | 96 (7.15) |  |
| Current drunk | 1723 (32.08) | 531 (39.54) | 451 (33.58) | 420 (31.30) | 321 (23.90) |  |
| Insurance, n (%) |  |  |  |  |  | 0.023 |
| No | 308 (5.73) | 91 (6.78) | 58 (4.33) | 87 (6.51) | 71 (5.29) |  |
| Yes | 5064 (94.27) | 1252 (93.22) | 1285 (95.67) | 1256 (93.49) | 1272 (94.71) |  |
| Sleep duration (hours) | 7.00 (5.00, 8.00) | 7.00 (5.00, 8.00) | 7.00 (5.00, 8.00) | 7.00 (6.00, 8.00) | 7.00 (6.00, 8.00) | 0.141 |
| BMI (kg/m²) | 23.09 (20.82, 25.61) | 20.19 (18.77, 21.72) | 22.18 (20.62, 23.60) | 24.24 (22.54, 25.76) | 26.82 (24.64, 28.97) | <0.001 |
| Hypertension, n (%) |  |  |  |  |  | <0.001 |
| No | 4046 (75.32) | 1178 (87.68) | 1107 (82.46) | 952 (70.86) | 809 (60.27) |  |
| Yes | 1326 (24.68) | 165 (12.32) | 236 (17.54) | 391 (29.14) | 534 (39.73) |  |
| Diabetes, n (%) |  |  |  |  |  | <0.001 |
| No | 5050 (94.00) | 1322 (98.41) | 1310 (97.54) | 1262 (94.00) | 1156 (86.06) |  |
| Yes | 322 (6.00) | 21 (1.59) | 33 (2.46) | 81 (6.00) | 187 (13.94) |  |
| Chronic lung disease, n (%) |  |  |  |  |  | 0.023 |
| No | 4944 (92.03) | 1221 (90.89) | 1221 (90.90) | 1253 (93.27) | 1250 (93.06) |  |
| Yes | 428 (7.97) | 122 (9.11) | 122 (9.10) | 90 (6.73) | 93 (6.94) |  |
| Heart disease, n (%) |  |  |  |  |  | <0.001 |
| No | 4862 (90.51) | 1261 (93.86) | 1225 (91.23) | 1208 (89.93) | 1168 (87.00) |  |
| Yes | 510 (9.49) | 82 (6.14) | 118 (8.77) | 135 (10.07) | 175 (13.00) |  |
| Stroke, n (%) |  |  |  |  |  | <0.001 |
| No | 5262 (97.95) | 1323 (98.51) | 1321 (98.36) | 1321 (98.36) | 1297 (96.57) |  |
| Yes | 110 (2.05) | 20 (1.49) | 22 (1.64) | 22 (1.64) | 46 (3.43) |  |
| Mental illness, n (%) |  |  |  |  |  | 0.629 |
| No | 5321 (99.04) | 1327 (98.81) | 1334 (99.30) | 1330 (99.03) | 1330 (99.03) |  |
| Yes | 51 (0.96) | 16 (1.19) | 9 (0.70) | 13 (0.97) | 13 (0.97) |  |
| Dyslipidemia, n (%) |  |  |  |  |  | <0.001 |
| No | 4859 (90.45) | 1290 (96.05) | 1266 (94.30) | 1207 (89.87) | 1096 (81.59) |  |
| Yes | 513 (9.55) | 53 (3.95) | 77 (5.70) | 136 (10.13) | 247 (18.41) |  |
| Liver disease, n (%) |  |  |  |  |  | 0.821 |
| No | 5227 (97.29) | 1306 (97.22) | 1307 (97.30) | 1311 (97.62) | 1303 (97.04) |  |
| Yes | 145 (2.71) | 37 (2.78) | 36 (2.70) | 32 (2.38) | 40 (2.96) |  |
| Kidney disease, n (%) |  |  |  |  |  | 0.430 |
| No | 5130 (95.50) | 1276 (95.04) | 1284 (95.58) | 1292 (96.23) | 1278 (95.15) |  |
| Yes | 242 (4.50) | 67 (4.96) | 59 (4.42) | 51 (3.77) | 65 (4.85) |  |
| Digestive disease, n (%) |  |  |  |  |  | <0.001 |
| No | 4428 (82.43) | 1051 (78.26) | 1111 (82.76) | 1111 (82.76) | 1154 (85.94) |  |
| Yes | 944 (17.57) | 292 (21.74) | 232 (17.24) | 232 (17.24) | 189 (14.06) |  |
| Asthma, n (%) |  |  |  |  |  | 0.349 |
| No | 5168 (96.20) | 1287 (95.83) | 1293 (96.26) | 1286 (95.76) | 1302 (96.95) |  |
| Yes | 204 (3.80) | 56 (4.17) | 50 (3.74) | 57 (4.24) | 41 (3.05) |  |
| Memory disease, n (%) |  |  |  |  |  | 0.036 |
| No | 5311 (98.86) | 1336 (99.48) | 1322 (98.44) | 1330 (99.03) | 1323 (98.51) |  |
| Yes | 61 (1.14) | 7 (0.52) | 21 (1.56) | 13 (0.97) | 20 (1.49) |  |
| Hip fracture, n (%) |  |  |  |  |  | 0.865 |
| No | 5294 (98.56) | 1322 (98.41) | 1322 (98.44) | 1326 (98.72) | 1325 (98.66) |  |
| Yes | 78 (1.44) | 21 (1.59) | 21 (1.56) | 17 (1.28) | 18 (1.34) |  |
| History of falls, n (%) |  |  |  |  |  | 0.043 |
| No | 4603 (85.68) | 1137 (84.66) | 1172 (87.24) | 1166 (86.79) | 1129 (84.04) |  |
| Yes | 769 (14.32) | 206 (15.34) | 171 (12.76) | 177 (13.21) | 214 (15.96) |  |
| Life satisfaction, n (%) |  |  |  |  |  | <0.001 |
| No | 1313 (24.45) | 274 (20.39) | 317 (23.63) | 347 (25.81) | 375 (27.95) |  |
| Yes | 4059 (75.55) | 1069 (79.61) | 1026 (76.37) | 996 (74.19) | 968 (72.05) |  |
| Psychological health (CESD-10,scores) | 6.00 (3.00, 11.00) | 6.60 (3.00, 11.00) | 6.00 (3.00, 11.00) | 6.00 (3.00, 11.00) | 6.00 (3.00, 11.00) | 0.287 |
| WBC(×10⁹/L) | 6.00 (4.90, 7.28) | 5.70 (4.70, 7.00) | 5.80 (4.80, 7.20) | 6.00 (5.00, 7.30) | 6.30 (5.20, 7.50) | <0.001 |
| Blood glucose (mmol/L) | 102.24 (94.68, 112.32) | 97.38 (90.54, 105.03) | 100.26 (93.60, 108.36) | 102.78 (95.94, 111.06) | 110.88 (100.62, 130.14) | <0.001 |
| TC (mmol/L) | 193.69±38.38 | 181.97±36.52 | 189.67±34.55 | 197.21±35.91 | 205.91±41.99 | <0.001 |
| Triglycerides (mmol/L) | 102.66 (73.46, 150.45) | 69.92 (55.76, 89.39) | 90.27 (70.80, 120.36) | 112.39 (87.61, 150.45) | 168.15 (123.46, 246.03) | <0.001 |
| HDL (mmol/L) | 49.10 (40.21, 59.92) | 57.99 (48.33, 68.04) | 52.96 (43.69, 63.02) | 47.55 (39.82, 56.44) | 40.98 (34.02, 48.33) | <0.001 |
| LDL (mmol/L) | 117.12±35.34 | 109.12±32.20 | 116.67±30.75 | 123.91±33.20 | 118.80±42.43 | <0.001 |
| CRP (mg/L) | 1.02 (0.54, 2.12) | 0.74 (0.43, 1.64) | 0.82 (0.47, 1.78) | 1.11 (0.58, 2.04) | 1.50 (0.82, 3.00) | <0.001 |
| IADL limitation (≥1 item), n (%) | 903 (16.81) | 214 (15.93) | 195 (14.52) | 239 (17.80) | 255 (18.99) | 0.010 |
| BADL limitation (≥1 item), n (%) | 626 (11.65) | 142 (10.54) | 121 (9.04) | 159 (11.85) | 204 (15.16) | <0.001 |
| Arthritis, n (%) |  |  |  |  |  | 0.028 |
| No | 3657 (68.08) | 950 (70.74) | 915 (68.13) | 915 (68.13) | 877 (65.30) |  |
| Yes | 1715 (31.92) | 393 (29.26) | 428 (31.87) | 428 (31.87) | 466 (34.70) |  |

*Note:1. Data are presented as mean ± SD, median (IQR), or n (%).*

*2. P-values were calculated using chi-square tests for categorical variables, ANOVA for continuous variables expressed as means, and the Kruskal-Wallis test for those expressed as medians.*

*3.Abbreviations: TyG-WHtR:triglyceride-glucose waist-to-height ratio; BMI:* *body mass index;WC:* *waist circumference; WBC:* *White blood cells; CRP: C-reactive protein; TC: total cholesterol; HDL: high density lipoprotein; LDL: low density lipoprotein; BADL: Basic Activities of Daily Living; IADL: Instrumental Activities of Daily Living.*

*4.Participants were divided into quartiles according to TyG-WHtR, with cut-off values of 4.067, 4.578, and 5.140.*

Table S 5 Comprehensive baseline characteristics of the study population stratified by incident arthritis status (after multiple imputation)

| Characteristics | Total (n=5372) | No arthritis (n=3657) | Arthritis (n=1715) | *P* value |
| --- | --- | --- | --- | --- |
| TyG-WHtR index | 4.62±0.86 | 4.60±0.85 | 4.66±0.87 | 0.020 |
| Age (years) | 58.00 (51.00, 65.00) | 58.00 (51.00, 65.00) | 58.00 (52.00, 65.00) | 0.297 |
| Sex, n (%) |  |  |  | <0.001 |
| Female | 2704.00 (50.34) | 1753.00 (47.94) | 951.00 (55.45) | |
| Male | 2668.00 (49.66) | 1904.00 (52.06) | 764.00 (44.55) | |
| Marital status, n (%) |  |  |  | 0.095 |
| Others | 624.00 (11.62) | 406.00 (11.10) | 218.00 (12.71) | |
| Married | 4748.00 (88.38) | 3251.00 (88.90) | 1497.00 (87.29) | |
| Education level, n (%) |  |  |  | <0.001 |
| Primary school or lower | 3595.60 (66.93) | 2327.80 (63.65) | 1267.80 (73.92) | |
| Middle school | 1151.00 (21.43) | 850.00 (23.24) | 301.00 (17.55) | |
| High school or higher | 625.40 (11.64) | 479.20 (13.10) | 146.20 (8.52) | |
| Residence, n (%) |  |  |  | <0.001 |
| Urban | 1982.00 (36.90) | 1449.00 (39.62) | 533.00 (31.08) | |
| Rural | 3390.00 (63.10) | 2208.00 (60.38) | 1182.00 (68.92) | |
| Sleep duration (hours) | 7.00 (5.00, 8.00) | 7.00 (6.00, 8.00) | 6.00 (5.00, 8.00) | <0.001 |
| Insurance, n (%) |  |  |  | 0.732 |
| No | 307.60 (5.73) | 206.20 (5.64) | 101.40 (5.91) | |
| Yes | 5064.40 (94.27) | 3450.80 (94.36) | 1613.60 (94.09) | |
| Smoking status, n (%) |  |  |  | 0.071 |
| Never | 3173.60 (59.08) | 2121.80 (58.02) | 1051.80 (61.33) | |
| Former smoker | 494.20 (9.20) | 344.60 (9.42) | 149.60 (8.72) | |
| Current smoker | 1704.20 (31.72) | 1190.60 (32.56) | 513.60 (29.95) | |
| Drinking status, n (%) |  |  |  | 0.070 |
| Never | 3224.00 (60.01) | 2163.00 (59.15) | 1061.00 (61.87) | |
| Former drunk | 424.60 (7.90) | 284.00 (7.77) | 140.60 (8.20) | |
| Current drunk | 1723.40 (32.08) | 1210.00 (33.09) | 513.40 (29.94) | |
| Hypertension, n (%) |  |  |  | 0.907 |
| No | 4046.00 (75.32) | 2752.20 (75.26) | 1293.80 (75.44) | |
| Yes | 1326.00 (24.68) | 904.80 (24.74) | 421.20 (24.56) | |
| Diabetes, n (%) |  |  |  | 0.146 |
| No | 5049.80 (94.00) | 3425.40 (93.67) | 1624.40 (94.72) | |
| Yes | 322.20 (6.00) | 231.60 (6.33) | 90.60 (5.28) | |
| Chronic lung disease, n (%) |  |  |  | 0.027 |
| No | 4943.80 (92.03) | 3386.40 (92.60) | 1557.40 (90.81) | |
| Yes | 428.20 (7.97) | 270.60 (7.40) | 157.60 (9.19) | |
| Heart disease, n (%) |  |  |  | 0.829 |
| No | 4862.00 (90.51) | 3312.40 (90.58) | 1549.60 (90.36) | |
| Yes | 510.00 (9.49) | 344.60 (9.42) | 165.40 (9.64) | |
| Stroke, n (%) |  |  |  | 0.246 |
| No | 5262.00 (97.95) | 3576.00 (97.79) | 1686.00 (98.31) | |
| Yes | 110.00 (2.05) | 81.00 (2.21) | 29.00 (1.69) | |
| Mental illness, n (%) |  |  |  | 0.196 |
| No | 5320.60 (99.04) | 3626.80 (99.17) | 1693.80 (98.76) | |
| Yes | 51.40 (0.96) | 30.20 (0.83) | 21.20 (1.24) | |
| Dyslipidemia, n (%) |  |  |  | 0.838 |
| No | 4859.20 (90.45) | 3305.80 (90.40) | 1553.40 (90.58) | |
| Yes | 512.80 (9.55) | 351.20 (9.60) | 161.60 (9.42) | |
| Liver disease, n (%) |  |  |  | 0.014 |
| No | 5226.60 (97.29) | 3572.20 (97.68) | 1654.40 (96.47) | |
| Yes | 145.40 (2.71) | 84.80 (2.32) | 60.60 (3.53) | |
| Kidney disease, n (%) |  |  |  | <0.001 |
| No | 5130.20 (95.50) | 3528.20 (96.48) | 1602.00 (93.41) | |
| Yes | 241.80 (4.50) | 128.80 (3.52) | 113.00 (6.59) | |
| Digestive disease, n (%) |  |  |  | <0.001 |
| No | 4428.00 (82.43) | 3099.20 (84.75) | 1328.80 (77.48) | |
| Yes | 944.00 (17.57) | 557.80 (15.25) | 386.20 (22.52) | |
| Asthma, n (%) |  |  |  | 0.590 |
| No | 5167.80 (96.20) | 3522.00 (96.31) | 1645.80 (95.97) | |
| Yes | 204.20 (3.80) | 135.00 (3.69) | 69.20 (4.03) | |
| Memory disease, n (%) |  |  |  | 0.165 |
| No | 5311.00 (98.86) | 3621.00 (99.02) | 1690.00 (98.54) | |
| Yes | 61.00 (1.14) | 36.00 (0.98) | 25.00 (1.46) | |
| Psychological health (CESD-10,scores) | 6.00 (3.00, 11.00) | 6.00 (3.00, 10.00) | 8.00 (4.00, 12.90) | <0.001 |
| WBC (×10⁹/L) | 6.00 (4.90, 7.28) | 5.94 (4.90, 7.29) | 6.00 (4.90, 7.25) | 0.786 |
| Blood glucose (mg/dL) | 102.24 (94.68, 112.32) | 102.60 (94.86, 112.86) | 101.52 (94.50, 111.51) | 0.028 |
| TC(mg/dL) | 193.69±38.38 | 192.98±38.71 | 195.21±37.64 | 0.047 |
| Triglycerides (mg/dL) | 102.66 (73.46, 150.45) | 100.89 (72.57, 149.57) | 106.20 (76.11, 152.22) | 0.008 |
| HDL cholesterol (mg/dL) | 49.10 (40.21, 59.92) | 48.71 (39.82, 60.31) | 49.87 (41.37, 59.92) | 0.031 |
| LDL cholesterol (mg/dL) | 117.12±35.34 | 116.86±35.43 | 117.69±35.15 | 0.419 |
| C-reactive protein (mg/L) | 1.02 (0.54, 2.12) | 1.02 (0.54, 2.13) | 1.02 (0.54, 2.12) | 0.926 |
| IADL limitation (≥1 item), n (%) | 903.00 (16.81) | 548.00 (14.98) | 355.00 (20.70) | <0.001 |
| BADL limitation (≥1 item), n (%) | 625.80 (11.65) | 338.60 (9.26) | 287.20 (16.75) | <0.001 |
| BMI (kg/m²) | 23.09 (20.82, 25.61) | 23.10 (20.72, 25.59) | 23.08 (20.98, 25.65) | 0.308 |
| Hip fracture, n (%) |  |  |  | 0.927 |
| No | 5294.40 (98.56) | 3603.40 (98.53) | 1691.00 (98.60) | |
| Yes | 77.60 (1.44) | 53.60 (1.47) | 24.00 (1.40) | |
| History of falls, n (%) |  |  |  | <0.001 |
| No | 4602.80 (85.68) | 3175.20 (86.83) | 1427.60 (83.24) | |
| Yes | 769.20 (14.32) | 481.80 (13.17) | 287.40 (16.76) | |
| Life satisfaction, n (%) |  |  |  | 0.057 |
| No | 1313.20 (24.45) | 922.00 (25.21) | 391.20 (22.81) | |
| Yes | 4058.80 (75.55) | 2735.00 (74.79) | 1323.80 (77.19) | |

*Note:1 Note:1. Data are presented as mean ± SD, median (IQR), or n (%).*

*2. Abbreviations: TyG-WHtR:triglyceride-glucose waist-to-height ratio; BMI:* *body mass index;WC:* *waist circumference; WBC:* *White blood cells; CRP: C-reactive protein; TC: total cholesterol; HDL: high density lipoprotein; LDL: low density lipoprotein; BADL: Basic Activities of Daily Living; IADL: Instrumental Activities of Daily Living.*

Table S 6 Baseline characteristics of the study population stratified by quartiles of TyG-WHtR using the original, -imputed dataset

| Characteristics | Total (n=5372) | Q1 (n=1343) | Q2 (n=1343) | Q3 (n=1343) | Q4 (n=1343) | *P* value |
| --- | --- | --- | --- | --- | --- | --- |
| Age (years) | 59.04±9.40 | 58.76±9.53 | 58.92±9.48 | 58.81±9.41 | 59.68±9.15 | 0.039 |
| Sex, n (%) |  |  |  |  |  | <0.001 |
| Female | 2704 (50.34) | 463 (34.48) | 611 (45.50) | 716 (53.31) | 914 (68.06) |  |
| Male | 2668 (49.66) | 880 (65.52) | 732 (54.50) | 627 (46.69) | 429 (31.94) |  |
| Marital status, n (%) |  |  |  |  |  | 0.349 |
| Others | 624 (11.62) | 146 (10.87) | 157 (11.69) | 148 (11.02) | 173 (12.88) |  |
| Married | 4748 (88.38) | 1197 (89.13) | 1186 (88.31) | 1195 (88.98) | 1170 (87.12) |  |
| Residence, n (%) |  |  |  |  |  | <0.001 |
| Urban | 1982 (36.90) | 408 (30.38) | 421 (31.35) | 552 (41.10) | 601 (44.75) |  |
| Rural | 3390 (63.10) | 935 (69.62) | 922 (68.65) | 791 (58.90) | 742 (55.25) |  |
| Education level, n (%) |  |  |  |  |  | 0.622 |
| Primary school or lower | 3593 (66.92) | 896 (66.77) | 889 (66.24) | 881 (65.65) | 927 (69.02) |  |
| Middle school | 1151 (21.44) | 290 (21.61) | 288 (21.46) | 300 (22.35) | 273 (20.33) |  |
| High school or higher | 625 (11.64) | 156 (11.62) | 165 (12.30) | 161 (12.00) | 143 (10.65) |  |
| Smoking status, n (%) |  |  |  |  |  | <0.001 |
| Never | 3167 (59.09) | 609 (45.52) | 761 (56.71) | 832 (62.18) | 965 (71.91) |  |
| Former smoker | 493 (9.20) | 114 (8.52) | 114 (8.49) | 149 (11.14) | 116 (8.64) |  |
| Current smoker | 1700 (31.72) | 615 (45.96) | 467 (34.80) | 357 (26.68) | 261 (19.45) |  |
| Drinking status, n (%) |  |  |  |  |  | <0.001 |
| Never | 3222 (60.02) | 694 (51.71) | 788 (58.67) | 814 (60.75) | 926 (68.95) |  |
| Former drunk | 424 (7.90) | 118 (8.79) | 104 (7.74) | 106 (7.91) | 96 (7.15) |  |
| Current drunk | 1722 (32.08) | 530 (39.49) | 451 (33.58) | 420 (31.34) | 321 (23.90) |  |
| Insurance, n (%) |  |  |  |  |  | 0.021 |
| No | 306 (5.72) | 91 (6.80) | 58 (4.34) | 87 (6.51) | 70 (5.23) |  |
| Yes | 5044 (94.28) | 1247 (93.20) | 1279 (95.66) | 1250 (93.49) | 1268 (94.77) |  |
| Sleep duration (hours) | 7.00 (5.00, 8.00) | 7.00 (5.00, 8.00) | 7.00 (5.00, 8.00) | 7.00 (6.00, 8.00) | 7.00 (6.00, 8.00) | 0.131 |
| BMI (kg/m²) | 23.09 (20.83, 25.62) | 20.19 (18.77, 21.72) | 22.18 (20.62, 23.60) | 24.24 (22.53, 25.76) | 26.83 (24.65, 28.97) | <0.001 |
| Hypertension, n (%) |  |  |  |  |  | <0.001 |
| No | 4029 (75.28) | 1169 (87.70) | 1105 (82.46) | 948 (70.80) | 807 (60.22) |  |
| Yes | 1323 (24.72) | 164 (12.30) | 235 (17.54) | 391 (29.20) | 533 (39.78) |  |
| Diabetes, n (%) |  |  |  |  |  | <0.001 |
| No | 5009 (94.01) | 1303 (98.41) | 1304 (97.53) | 1251 (93.99) | 1151 (86.15) |  |
| Yes | 319 (5.99) | 21 (1.59) | 33 (2.47) | 80 (6.01) | 185 (13.85) |  |
| Lung disease, n (%) |  |  |  |  |  | 0.022 |
| No | 4930 (92.03) | 1216 (90.88) | 1216 (90.88) | 1249 (93.28) | 1249 (93.07) |  |
| Yes | 427 (7.97) | 122 (9.12) | 122 (9.12) | 90 (6.72) | 93 (6.93) |  |
| Heart disease, n (%) |  |  |  |  |  | <0.001 |
| No | 4840 (90.53) | 1253 (93.86) | 1218 (91.24) | 1206 (89.93) | 1163 (87.12) |  |
| Yes | 506 (9.47) | 82 (6.14) | 117 (8.76) | 135 (10.07) | 172 (12.88) |  |
| Stroke, n (%) |  |  |  |  |  | <0.001 |
| No | 5246 (97.95) | 1319 (98.51) | 1318 (98.36) | 1318 (98.36) | 1291 (96.56) |  |
| Yes | 110 (2.05) | 20 (1.49) | 22 (1.64) | 22 (1.64) | 46 (3.44) |  |
| Mental illness, n (%) |  |  |  |  |  | 0.588 |
| No | 5299 (99.05) | 1325 (98.81) | 1325 (99.33) | 1325 (99.03) | 1324 (99.03) |  |
| Yes | 51 (0.95) | 16 (1.19) | 9 (0.67) | 13 (0.97) | 13 (0.97) |  |
| Dyslipidemia, n (%) |  |  |  |  |  | <0.001 |
| No | 4779 (90.46) | 1258 (96.03) | 1250 (94.27) | 1187 (89.86) | 1084 (81.75) |  |
| Yes | 504 (9.54) | 52 (3.97) | 76 (5.73) | 134 (10.14) | 242 (18.25) |  |
| Liver disease, n (%) |  |  |  |  |  | 0.864 |
| No | 5199 (97.30) | 1297 (97.23) | 1300 (97.31) | 1304 (97.60) | 1298 (97.08) |  |
| Yes | 144 (2.70) | 37 (2.77) | 36 (2.69) | 32 (2.40) | 39 (2.92) |  |
| Kidney disease, n (%) |  |  |  |  |  | 0.415 |
| No | 5101 (95.51) | 1265 (95.04) | 1274 (95.57) | 1287 (96.26) | 1275 (95.15) |  |
| Yes | 240 (4.49) | 66 (4.96) | 59 (4.43) | 50 (3.74) | 65 (4.85) |  |
| Digestive disease, n (%) |  |  |  |  |  | <0.001 |
| No | 4418 (82.46) | 1049 (78.28) | 1107 (82.80) | 1110 (82.77) | 1152 (85.97) |  |
| Yes | 940 (17.54) | 291 (21.72) | 230 (17.20) | 231 (17.23) | 188 (14.03) |  |
| Asthma, n (%) |  |  |  |  |  | 0.352 |
| No | 5159 (96.20) | 1286 (95.83) | 1289 (96.27) | 1285 (95.75) | 1299 (96.94) |  |
| Yes | 204 (3.80) | 56 (4.17) | 50 (3.73) | 57 (4.25) | 41 (3.06) |  |
| Memory disease, n (%) |  |  |  |  |  | 0.036 |
| No | 5299 (98.86) | 1332 (99.48) | 1317 (98.43) | 1328 (99.03) | 1322 (98.51) |  |
| Yes | 61 (1.14) | 7 (0.52) | 21 (1.57) | 13 (0.97) | 20 (1.49) |  |
| Hip fracture, n (%) |  |  |  |  |  | 0.844 |
| No | 5257 (98.57) | 1312 (98.42) | 1318 (98.43) | 1314 (98.72) | 1313 (98.72) |  |
| Yes | 76 (1.43) | 21 (1.58) | 21 (1.57) | 17 (1.28) | 17 (1.28) |  |
| Fall down, n (%) |  |  |  |  |  | 0.043 |
| No | 4569 (85.72) | 1129 (84.70) | 1166 (87.28) | 1156 (86.85) | 1118 (84.06) |  |
| Yes | 761 (14.28) | 204 (15.30) | 170 (12.72) | 175 (13.15) | 212 (15.94) |  |
| Life satisfaction, n (%) |  |  |  |  |  | <0.001 |
| No | 1187 (24.36) | 245 (20.42) | 293 (23.72) | 310 (25.33) | 339 (27.92) |  |
| Yes | 3686 (75.64) | 955 (79.58) | 942 (76.28) | 914 (74.67) | 875 (72.08) |  |
| Psychological health (CESD-10,scores) | 6.00 (3.00, 11.00) | 6.00 (3.00, 11.00) | 6.00 (3.00, 11.00) | 6.00 (3.00, 11.00) | 6.00 (3.00, 11.00) | 0.284 |
| White blood cells (×10⁹/L) | 6.00 (4.90, 7.28) | 5.70 (4.70, 7.00) | 5.80 (4.80, 7.20) | 6.00 (5.00, 7.30) | 6.30 (5.20, 7.50) | <0.001 |
| Blood glucose (mg/dL) | 102.24 (94.68, 112.32) | 97.38 (90.54, 105.03) | 100.26 (93.60, 108.36) | 102.78 (95.94, 111.06) | 110.88 (100.62, 130.14) | <0.001 |
| Total cholesterol(mg/dL) | 193.69±38.38 | 181.97±36.52 | 189.67±34.55 | 197.21±35.91 | 205.91±41.99 | <0.001 |
| Triglycerides (mg/dL) | 102.66 (73.46, 150.45) | 69.92 (55.76, 89.39) | 90.27 (70.80, 120.36) | 112.39 (87.61, 150.45) | 168.15 (123.46, 246.03) | <0.001 |
| HDL cholesterol (mg/dL) | 49.10 (40.21, 59.92) | 57.99 (48.33, 68.04) | 52.96 (43.69, 62.92) | 47.55 (39.82, 56.44) | 40.98 (34.02, 48.33) | <0.001 |
| LDL cholesterol (mg/dL) | 117.30±35.11 | 109.12±32.20 | 116.67±30.75 | 123.91±33.20 | 119.50±41.69 | <0.001 |
| C-reactive protein (mg/L) | 1.02 (0.54, 2.12) | 0.74 (0.43, 1.64) | 0.82 (0.47, 1.78) | 1.11 (0.58, 2.04) | 1.50 (0.82, 3.00) | <0.001 |
| Any IADL limitation (≥1 item), n (%) | 903 (16.81) | 214 (15.93) | 195 (14.52) | 239 (17.80) | 255 (18.99) | 0.01 |
| BADL limitation (≥1 item), n (%) | 621 (11.66) | 140 (10.52) | 121 (9.10) | 157 (11.80) | 203 (15.22) | <0.001 |
| Arthritis, n (%) |  |  |  |  |  | 0.028 |
| No | 3657 (68.08) | 950 (70.74) | 915 (68.13) | 915 (68.13) | 877 (65.30) |  |
| Yes | 1715 (31.92) | 393 (29.26) | 428 (31.87) | 428 (31.87) | 466 (34.70) |  |

*Note:1 Note:1. Data are presented as mean ± SD, median (IQR), or n (%).*

*2. P-values were calculated using chi-square tests for categorical variables, ANOVA for continuous variables expressed as means, and the Kruskal-Wallis test for those expressed as medians.*

*3.Abbreviations: TyG-WHtR:triglyceride-glucose waist-to-height ratio; BMI:* *body mass index;WC:* *waist circumference; WBC:* *White blood cells; CRP: C-reactive protein; TC: total cholesterol; HDL: high density lipoprotein; LDL: low density lipoprotein; BADL: Basic Activities of Daily Living; IADL: Instrumental Activities of Daily Living.*

*4.Participants were divided into quartiles according to TyG-WHtR, with cut-off values of 4.067, 4.578, and 5.140.*

Table S 7 Baseline characteristics of the study population stratified by incident arthritis status using the original, un-imputed dataset

| Characteristics | Total (n=5372) | No arthritis (n=3657) | Arthritis (n=1715) | *P* value |
| --- | --- | --- | --- | --- |
| TyG-WHtR index | 4.62±0.86 | 4.60±0.85 | 4.66±0.87 | 0.021 |
| Age (years) | 58.00 (51.00, 65.00) | 58.00 (51.00, 65.00) | 58.00 (52.00, 65.00) | 0.297 |
| Sex, n (%) |  |  |  | <0.001 |
| Female | 2704.00 (50.34) | 1753.00 (47.94) | 951.00 (55.45) | |
| Male | 2668.00 (49.66) | 1904.00 (52.06) | 764.00 (44.55) | |
| Marital status, n (%) |  |  |  | 0.095 |
| Others | 624.00 (11.62) | 406.00 (11.10) | 218.00 (12.71) | |
| Married | 4748.00 (88.38) | 3251.00 (88.90) | 1497.00 (87.29) | |
| Education level, n (%) |  |  |  | <0.001 |
| Primary school or lower | 3593.00 (66.92) | 2326.00 (63.64) | 1267.00 (73.92) | |
| Middle school | 1151.00 (21.44) | 850.00 (23.26) | 301.00 (17.56) | |
| High school or higher | 625.00 (11.64) | 479.00 (13.11) | 146.00 (8.52) | |
| Residence, n (%) |  |  |  | <0.001 |
| Urban | 1982.00 (36.90) | 1449.00 (39.62) | 533.00 (31.08) | |
| Rural | 3390.00 (63.10) | 2208.00 (60.38) | 1182.00 (68.92) | |
| Sleep duration (hours) | 7.00 (5.00, 8.00) | 7.00 (6.00, 8.00) | 6.00 (5.00, 8.00) | <0.001 |
| Insurance, n (%) |  |  |  | 0.739 |
| No | 306.00 (5.72) | 205.00 (5.63) | 101.00 (5.90) | |
| Yes | 5044.00 (94.28) | 3434.00 (94.37) | 1610.00 (94.10) | |
| Smoking status, n (%) |  |  |  | 0.067 |
| Never | 3167.00 (59.09) | 2117.00 (58.02) | 1050.00 (61.37) | |
| Former smoker | 493.00 (9.20) | 344.00 (9.43) | 149.00 (8.71) | |
| Current smoker | 1700.00 (31.72) | 1188.00 (32.56) | 512.00 (29.92) | |
| Drinking status, n (%) |  |  |  | 0.076 |
| Never | 3222.00 (60.02) | 2163.00 (59.16) | 1059.00 (61.86) | |
| Former drunk | 424.00 (7.90) | 284.00 (7.77) | 140.00 (8.18) | |
| Current drunk | 1722.00 (32.08) | 1209.00 (33.07) | 513.00 (29.96) | |
| Hypertension, n (%) |  |  |  | 0.934 |
| No | 4029.00 (75.28) | 2743.00 (75.23) | 1286.00 (75.38) | |
| Yes | 1323.00 (24.72) | 903.00 (24.77) | 420.00 (24.62) | |
| Diabetes, n (%) |  |  |  | 0.132 |
| No | 5009.00 (94.01) | 3400.00 (93.66) | 1609.00 (94.76) | |
| Yes | 319.00 (5.99) | 230.00 (6.34) | 89.00 (5.24) | |
| Chronic lung disease, n (%) |  |  |  | 0.028 |
| No | 4930.00 (92.03) | 3378.00 (92.60) | 1552.00 (90.81) | |
| Yes | 427.00 (7.97) | 270.00 (7.40) | 157.00 (9.19) | |
| Heart disease, n (%) |  |  |  | 0.839 |
| No | 4840.00 (90.53) | 3298.00 (90.60) | 1542.00 (90.39) | |
| Yes | 506.00 (9.47) | 342.00 (9.40) | 164.00 (9.61) | |
| Stroke, n (%) |  |  |  | 0.246 |
| No | 5246.00 (97.95) | 3565.00 (97.78) | 1681.00 (98.30) | |
| Yes | 110.00 (2.05) | 81.00 (2.22) | 29.00 (1.70) | |
| Mental illness, n (%) |  |  |  | 0.202 |
| No | 5299.00 (99.05) | 3613.00 (99.18) | 1686.00 (98.77) | |
| Yes | 51.00 (0.95) | 30.00 (0.82) | 21.00 (1.23) | |
| Dyslipidemia, n (%) |  |  |  | 0.866 |
| No | 4779.00 (90.46) | 3258.00 (90.40) | 1521.00 (90.59) | |
| Yes | 504.00 (9.54) | 346.00 (9.60) | 158.00 (9.41) | |
| Liver disease, n (%) |  |  |  | 0.014 |
| No | 5199.00 (97.30) | 3556.00 (97.69) | 1643.00 (96.48) | |
| Yes | 144.00 (2.70) | 84.00 (2.31) | 60.00 (3.52) | |
| Kidney disease, n (%) |  |  |  | <0.001 |
| No | 5101.00 (95.51) | 3513.00 (96.48) | 1588.00 (93.41) | |
| Yes | 240.00 (4.49) | 128.00 (3.52) | 112.00 (6.59) | |
| Digestive disease, n (%) |  |  |  | <0.001 |
| No | 4418.00 (82.46) | 3096.00 (84.78) | 1322.00 (77.49) | |
| Yes | 940.00 (17.54) | 556.00 (15.22) | 384.00 (22.51) | |
| Asthma, n (%) |  |  |  | 0.593 |
| No | 5159.00 (96.20) | 3519.00 (96.31) | 1640.00 (95.96) | |
| Yes | 204.00 (3.80) | 135.00 (3.69) | 69.00 (4.04) | |
| Memory disease, n (%) |  |  |  | 0.161 |
| No | 5299.00 (98.86) | 3617.00 (99.01) | 1682.00 (98.54) | |
| Yes | 61.00 (1.14) | 36.00 (0.99) | 25.00 (1.46) | |
| Psychological health (CESD-10,scores) | 6.00 (3.00, 11.00) | 6.00 (3.00, 10.00) | 8.00 (4.00, 13.00) | <0.001 |
| White blood cells (×10⁹/L) | 6.00 (4.90, 7.28) | 5.97 (4.90, 7.30) | 6.00 (4.90, 7.20) | 0.867 |
| Blood glucose (mg/dL) | 102.24 (94.68, 112.32) | 102.60 (94.86, 112.86) | 101.52 (94.50, 111.51) | 0.028 |
| Total cholesterol(mg/dL) | 193.69±38.38 | 192.98±38.71 | 195.21±37.64 | 0.045 |
| Triglycerides (mg/dL) | 102.66 (73.46, 150.45) | 100.89 (72.57, 149.57) | 106.20 (76.11, 152.22) | 0.008 |
| HDL cholesterol (mg/dL) | 49.10 (40.21, 59.92) | 48.71 (39.82, 60.02) | 49.87 (41.37, 59.92) | 0.030 |
| LDL cholesterol (mg/dL) | 117.30±35.11 | 117.00±35.23 | 117.92±34.86 | 0.370 |
| C-reactive protein (mg/L) | 1.02 (0.54, 2.12) | 1.02 (0.54, 2.13) | 1.02 (0.54, 2.12) | 0.926 |
| IADL (No. of difficulties) | 0.00 (0.00, 0.00) | 0.00 (0.00, 0.00) | 0.00 (0.00, 0.00) | <0.001 |
| Any IADL difficulty (≥1), n (%) | 903.00 (16.81) | 548.00 (14.98) | 355.00 (20.70) | <0.001 |
| BADL (No. of difficulties) | 0.00 (0.00, 0.00) | 0.00 (0.00, 0.00) | 0.00 (0.00, 0.00) | <0.001 |
| Any BADL difficulty (≥1), n (%) | 621.00 (11.66) | 337.00 (9.31) | 284.00 (16.67) | <0.001 |
| Waist circumference (cm) | 85.15±10.03 | 85.16±10.02 | 85.13±10.05 | 0.922 |
| BMI (kg/m²) | 23.09 (20.83, 25.62) | 23.09 (20.72, 25.59) | 23.08 (20.98, 25.66) | 0.311 |
| TyG index | 8.57 (8.21, 9.02) | 8.57 (8.19, 9.03) | 8.58 (8.25, 9.01) | 0.185 |
| Hip fracture, n (%) |  |  |  | 1.000 |
| No | 5257.00 (98.57) | 3575.00 (98.57) | 1682.00 (98.59) | |
| Yes | 76.00 (1.43) | 52.00 (1.43) | 24.00 (1.41) | |
| History of falls, n (%) |  |  |  | <0.001 |
| No | 4569.00 (85.72) | 3150.00 (86.90) | 1419.00 (83.23) | |
| Yes | 761.00 (14.28) | 475.00 (13.10) | 286.00 (16.77) | |
| Life satisfaction, n (%) |  |  |  | 0.044 |
| No | 1187.00 (24.36) | 838.00 (25.22) | 349.00 (22.52) | |
| Yes | 3686.00 (75.64) | 2485.00 (74.78) | 1201.00 (77.48) | |

*Note:1 Note:1. Data are presented as mean ± SD, median (IQR), or n (%).*

*2. Abbreviations: TyG-WHtR:triglyceride-glucose waist-to-height ratio; BMI:* *body mass index;WC:* *waist circumference; WBC:* *White blood cells; CRP: C-reactive protein; TC: total cholesterol; HDL: high density lipoprotein; LDL: low density lipoprotein; BADL: Basic Activities of Daily Living; IADL: Instrumental Activities of Daily Living.*
